**High activity before breeding improves reproductive performance by enhancing mitochondrial function and biogenesis**

Yufeng Zhang<sup>1,3</sup>, Adam L. Brasher<sup>1</sup>, Noel R. Park<sup>1</sup>, Halie A. Taylor<sup>1</sup>, Andreas N. Kavazis<sup>2</sup>, and Wendy R. Hood<sup>1</sup>

<sup>1</sup>Department of Biological Sciences, Auburn University, Auburn, AL

<sup>2</sup>School of Kinesiology, Auburn University, Auburn, AL

<sup>3</sup>Present Address: Buck Institute for Research on Aging, Novato, CA

**Corresponding author**

Yufeng Zhang

Buck Institute for Research on Aging

8001 Redwood Boulevard

Novato, CA 94945

E-mail: [yzhang@buckinstitute.org](mailto:yzhang@buckinstitute.org)

## **ABSTRACT**

Understanding of physiological responses of organisms is typically based on data collected during an isolated event. Although many fundamental insights have been gained from these studies, evaluating the response to a single event ignores the fact that each individual has experienced a unique set of events throughout its life that may have altered its physiology. The idea that prior experiences can influence subsequent performance is known as a carry-over effect. Carry-over effects may explain much of the variation in performance found among individuals. For example, high physical activity has been shown to improve mitochondrial respiratory function and biogenesis and reduce oxidative stress and has been linked to improved health and longevity. In this study, we asked if the bioenergetic differences between active and inactive individuals carry over to impact performance in a subsequent reproductive event and alter a females' reproductive outcome. Female mice that had access to running wheel for a month before mating gave birth to a larger litter and weaned a heavier litter, indicating that high physical activity had a positive carry-over effect to reproduction. Mice that ran also displayed higher mitochondria respiration and biogenesis with no changes in endogenous antioxidant enzymes. These results provide a mechanistic framework for how the conditions that animals experience before breeding can impact reproductive outcomes.

## **Keywords**

Carry-over effects, Running, Reproduction, Mitochondrial function, Oxidative stress

## 1. Introduction

Identifying the sources of variation in fitness within a population is a central challenge in evolutionary ecology. It is well established that a portion of that variation is shaped by prior experiences. The pre- and post-natal environment, level of parental care, chronic stress, and pathogen exposure at all life stages have been shown to alter the future performance of an individual (Naguib et al., 2006; Monaghan, 2008; Maestriperi and Mateo, 2009; Graham et al., 2011; Saino et al., 2012). Impacts that prior events have on subsequent performance are referred to as carry-over effects (Harrison et al., 2011; O'Connor et al., 2014). For many species, the environment experienced in the weeks and months before the onset of breeding is highly variable, and these environmental effects contribute to variance in the conditions of animals at the onset of reproduction. For females, individual condition determines the relative amount of resources that can be partitioned to offspring development and self-maintenance.

Much of the research on carry-over effects in adults has focused on how extrinsic conditions impact the condition of females. Food quantity and quality on wintering grounds (Perryman et al., 2002; Cook et al., 2004; Sorensen et al., 2009; Inger et al., 2010; Skrip et al., 2016), stress prior to (Legagneux et al., 2012), and weather conditions during migration (Finch et al., 2014) have all been shown to alter subsequent reproductive success, as indicated by a change in number, condition, and subsequent performance of the young that are produced. In many of these cases, variance in a female's reproductive success is correlated with variation in her body mass, a frequent indicator of variation in body fat. While adipose stores can both permit and support subsequent reproduction, fuel availability alone does not determine the capacity to allocate energy to young, nor are residual fat stores the singular variable that determines a female's condition after reproduction has ended. The biochemical processes responsible for

producing ATP are plastic. The capacity and relative efficiency of these processes may be improved or reduced in response to the intrinsic and extrinsic environment of the individual.

In relatively inactive models, such as humans and lab mice, running has been shown to elevate mitochondrial respiratory function (Ardies et al., 1987), reduce oxidative stress (Guers et al., 2016), and promote mitochondrial biogenesis (Meers et al., 2014). High physical activity (e.g., running) can exert effects on future reproduction, as intense, sustained exercise has been linked to inhibition of the reproductive axis (Warren and Perloth, 2001). In wild populations, relative level of activity will also vary among individuals. While high activity may be the normal for many species, bioenergetic differences are likely to occur between individuals or between seasons. Poor weather conditions may limit foraging time and whether a female must travel a relative long or relative short distance to mate may alter her bioenergetic capacity in the weeks and months before reproduction.

How much energy a mother allocates to reproduction is thought to be determined both by the size of the energy pool that she has available and how much of that pool she allocates to her own maintenance versus her offspring (Zera and Harshman, 2001; Zhang and Hood, 2016). By characterizing changes in mitochondria density, mitochondrial respiratory function, reactive oxygen species (ROS) emission, and markers of oxidative damage, we can deduce whether an increase in energy allocated to reproduction is associated with an increase in a female's capacity to produce ATP and thus, an increase in pool of energy that she has available. In addition, we can determine if an increase in energy allocated to reproduction is associated with a reduction in the allocation of energy to general tissue maintenance.

In this study, we asked if the bioenergetics differences between active (with a running wheel) and inactive (no access to a wheel) individuals would carry over to reproduction. We predicted that mothers that ran before reproduction would allocate more resources to reproduction. In addition, we predicted that the muscle and liver of mothers that ran would display lower oxidative damage and higher mitochondrial respiratory function, effectively mitigating many of the potential costs of reproduction. We also expected that the impact of running on the mother's mitochondria would be greater in the liver and skeletal muscle than the heart and brain because the liver and skeletal muscle have a high and variable metabolic demand (Rolfe and Brown, 1997) and because the body prioritizes consistent performance of the brain and heart over other organs (Zera and Harshman, 2001). Thus, mitochondrial performance in the liver and skeletal muscle should be more sensitive to the prior running event.

## **2. Material and Methods**

This study was divided into two experiments. The goal of the first experiment was to confirm that our running protocol induced the reported beneficial adaptations to mitochondria in mice. The second experiment evaluated whether running before reproduction impacts a female's reproductive performance and their bioenergetic state after reproduction has ended.

## **Animal care**

Adult outbred female ICR mice (obtained at 12 weeks of age) were used in both experiment 1 and 2 (Envigo, Huntingdon, UK). These experiments were conducted from May to July 2016. Animals were maintained on a 12:12 light-dark cycle at a temperature of 24°C. All mice were housed individually in standard mouse boxes (11.5" x 7.5" x 5"). Food and water were provided *ad libitum* for the duration of the study. All animal procedures were approved by the Auburn University Institutional Animal Care and Use Committee (PRN#2016-2885).

## **Experiment 1**

Twenty female ICR mice were randomly assigned to one of two experimental groups; no wheel ( $n = 10$ ) and wheel ( $n = 10$ ). Mice in the wheel group were given a saucer running wheel that includes a Fast-Trac saucer that sits on top of an Igloo shelter (Bio-serv, Flemington, NJ). Under these conditions, running is voluntary and expected to mimic the time mice would spend running in the wild (Meijer and Robbers, 2014). No wheel mice were housed with an Igloo without the attached saucer. Wheels (i.e., saucers) were kept in the boxes for 28 days and then removed. The activity of each mouse was recorded with a camera on 3 random nights. Mice with access to wheels were confirmed to be more active than mice without wheels and run on average of 30 minutes and 4 seconds an hour of each night recorded. Following removal of the wheels, all animals were given a 7-day period of rest to allow their tissues to return to a non-active state (Eston et al., 1996; Bruunsgaard et al., 1997). Then mice were euthanized and their tissues were dissected and evaluated as described below.

## Experiment 2

Twenty additional female ICR mice were randomly assigned to one of two experimental groups; no wheel ( $n = 10$ ) and wheel ( $n = 10$ ). Mice were treated the same as experiment 1 for 28 days with a 7-day resting period after voluntary running. Following the rest period, a male mouse was introduced to each female's cage. The male was removed when a vaginal plug was observed ( $7 \pm 4$  days). One female from each group did not successfully reproduce and was removed from the study, resulting in  $n = 9$  for each reproductive group. Gestation lasted 17-20 days. Litter sizes were recorded and adjusted to 8 pups on the day of birth. Pups were weaned, weighed and euthanized 21-days postpartum. We summed the body masses of the pups reared by each female at weaning. Females were euthanized 7 days after weaning. This timing would have allowed the females' reproductive tissues to regress permitting us to evaluate the consequences of reproduction independent of the ephemeral changes that are associated with reproduction (Zhang et al., 2017).

## Tissue collection

Organs collected and methods of analysis were similar for each experiment. After euthanasia, the liver, hind leg muscles (including the tibialis anterior, soleus, gastrocnemius, quadriceps, and hamstrings), heart, and brain were removed and weighed. The left lateral and right medial lobes of the liver and the entire right leg muscle were used for mitochondrial isolation. The left leg muscle, remaining liver, brain, and heart were flash frozen in liquid nitrogen, and stored at  $-80^{\circ}\text{C}$  for later analyses.

## **Mitochondrial measurements**

Mitochondria were isolated following procedures outlined previously (Hyatt et al., 2016; Mowry et al., 2016; Mowry et al., 2017). The fresh liver was minced and then homogenized in a Potter-Elvehjem PTFE pestle and glass tube. The resulting homogenate was centrifuged and the supernatant was then decanted through cheesecloth and centrifuged again. The resulting supernatant was discarded, and the mitochondria pellet was washed in liver isolation solution. This solution was again centrifuged, and the final mitochondria pellet was suspended in a mannitol-sucrose solution. The skeletal muscles were minced and then homogenized with a VITRUS polytron. Trypsin was added to aid the release of mitochondria from the myofibrils. The resulting homogenate was centrifuged, and the supernatant was then decanted through cheesecloth and centrifuged again. The mitochondria pellet was washed and finally resuspended in a mannitol-sucrose solution.

Mitochondria respiration was determined polarigraphically (Oxytherm, Hansatech Instruments, UK) following procedures outlined previously (Hyatt et al., 2016; Mowry et al., 2016; Mowry et al., 2017). Respiration was measured using 2 mM pyruvate, 2 mM malate, and 2 mM glutamate as a substrate. Maximal respiration (state 3) was defined as the rate of respiration in the presence of ADP and was initiated by adding 0.25 mM ADP to the chamber containing buffered mitochondria and respiratory substrates. State 4 respiration was measured after the phosphorylation of ADP was complete. The state 3 and 4 respirations were normalized to mitochondrial citrate synthase (CS). Respiratory control ratio (RCR) was calculated by dividing state 3 respiration by state 4 respiration.



The measurement of H<sub>2</sub>O<sub>2</sub> emission in isolated mitochondria was conducted using Amplex Red (ThermoFisher, Waltham, MA) (Kavazis et al., 2009b; Hyatt et al., 2017). Formation of resorufin (Amplex Red oxidation) by H<sub>2</sub>O<sub>2</sub> was measured at an excitation wavelength of 545 nm and an emission wavelength of 590 nm using a Synergy H1 Hybrid plate reader (BioTek; Winooski, VT, USA), at 37°C in a 96-well plate using succinate. Readings of resorufin formation were recorded every 5 minutes for 15 minutes, and a slope (rate of formation) was produced from these. The obtained slope was then converted into the rate of H<sub>2</sub>O<sub>2</sub> production using a standard curve and were normalized to CS.

Enzymatic assays to determine electron transport chain complex activity in isolated mitochondria were performed as described previously (Spinazzi et al., 2012b; Hyatt et al., 2017). Complex I (NADH dehydrogenase), complex II (succinate dehydrogenase), complex III (ubiquinol cytochrome c oxidoreductase), and complex IV (cytochrome c oxidoreductase) activities were determined and were normalized to mitochondrial protein concentration.

The CS activity was measured in whole tissue homogenate and was used as a proxy for mitochondrial density (Spinazzi et al., 2012a).

## **Western blot**

Western blots were conducted on liver, skeletal muscle, heart, and brain samples to analyze peroxisome proliferator-activated receptor gamma coactivator 1 alpha (PGC-1 $\alpha$ ; a key regulator of mitochondrial biogenesis; GTX37356; GeneTex), the antioxidants copper-zinc superoxide dismutase (CuZnSOD; GTX100554; GeneTex), manganese superoxide dismutase (MnSOD; GTX116093; GeneTex), glutathione peroxidase 1 (GPX-1; GTX116040; GeneTex), catalase (GTX110704; GeneTex), a marker of lipid peroxidation (4-Hydroxynonenal; 4-HNE;

ab46545; Abcam, Cambridge, MA), and a marker of protein oxidation (protein carbonyls; OxyBlot; s7150; EMD Millipore, Billerica, MA). Each membrane was stained by Ponceau, and was used as the loading and transfer control. A chemiluminescent system was used to visualize marked proteins (GE Healthcare Life Sciences, Pittsburgh, PA). Images were taken and analyzed with the ChemiDocIt Imaging System (UVP, LLC, Upland, CA).

## Statistics

A Grubbs' outlier test was used to identify statistical outliers and each was removed. Unless otherwise noted in tables or graphs  $n=10$ /group for experiment 1, and  $n=9$ /group for experiment 2. All comparisons were completed with a two-sample t-test. All statistical analyses were performed with SigmaStat 3.5 (Systat Software, Inc., Point Richmond, CA, USA). Significance was established at  $\alpha = 0.05$ .

## 3. Results

### Experiment 1: Effect of Running on Mitochondria and Oxidative Stress

Experiment 1 was design to test and confirm effects of running on mitochondrial and ROS markers. The RCR of liver mitochondria did not differ significantly ( $t_{18} = 0.95$ ,  $P = 0.36$ ; Figure *s1a*). In contrast, RCR of muscle mitochondria was significantly higher after running ( $t_{17} = 2.13$ ,  $P = 0.048$ ; Figure *s1b*).  $H_2O_2$  emission by liver mitochondria did not vary between mice that had or didn't have access to a wheel ( $t_{18} = 0.45$ ,  $P = 0.659$ ; Figure *s1c*).  $H_2O_2$  emission by muscle mitochondria displayed a trend suggesting that running may have contributed to lower  $H_2O_2$ , but this was not significant ( $t_{18} = 1.83$ ,  $P = 0.084$ ; Figure *s1d*).

Running resulted in higher mitochondrial content, determined by quantifying CS activity, in the liver ( $t_{18} = 3.20$ ,  $P = 0.005$ ; Figure s2a), muscle ( $t_{18} = 3.39$ ,  $P = 0.003$ ; Figure s2b), and heart ( $t_{16} = 2.50$ ,  $P = 0.024$ ; Figure s2c), but not the brain ( $t_{17} = 1.36$ ,  $P = 0.19$ , Figure s2d).

Liver, skeletal muscle, heart, and brain protein levels of lipid peroxidation (4-HNE), protein oxidation (protein carbonyls), and antioxidants (catalase, GPX1, CuZnSOD, MnSOD) did not differ between animals that had and had not run ( $P > 0.355$ ; Table s1).

## **Experiment 2: Effect of Prior Running on Reproductive Output and Maternal**

### **Bioenergetic Capacity**

Females that ran before breeding gave birth to a larger litter than those females that did not have access to a wheel ( $t_{16} = 2.46$ ,  $P = 0.026$ ; figure 1a). In addition, the cumulative mass of the 8 weaned pups was greater in those females that ran ( $t_{16} = 2.26$ ,  $P = 0.038$ ; figure 1b).

After reproduction ended, the mitochondria in the liver of females that had run before breeding displayed a higher RCR ( $t_{16} = 2.22$ ,  $P = 0.041$ ; Figure 2a). In contrast, muscle RCR did not vary ( $t_{15} = 0.89$ ,  $P = 0.388$ ; Figure 2b).  $H_2O_2$  emission of the liver and muscle did not vary between mice after reproduction ( $P > 0.505$ ; Figure 2c,d).

The differences in RCR were not reflected in the enzymatic activity of the mitochondrial complexes of the liver ( $P > 0.13$  Figure 3a,c,e,g), but muscle mitochondria displayed higher complex III ( $t_{16} = 3.56$ ,  $P = 0.003$ ; Figure 3f) and IV ( $t_{16} = 2.35$ ,  $P = 0.031$ ; Figure 3h) activities when mice ran before reproduction.

Mitochondrial content, which was estimated by CS activity, was greater in the liver of mice that ran before breeding ( $t_{16}= 2.74$ ,  $P = 0.015$ ; Figure 4a), but not in the muscle, heart, or brain ( $P>0.05$ , Figure 4b,c,d). Such changes were consistent with PGC-1 $\alpha$  protein levels in liver ( $t_{16}= 3.21$ ,  $P = 0.005$ ; Figure 5a).

Western blots indicated that liver 4-HNE was higher in the group with wheel compared to the one without it ( $t_{15}= 3.00$ ,  $P = 0.009$ ; Table 1). Other makers of oxidative damage (i.e., protein carbonyls) and antioxidant levels in the liver, muscle, heart, and brain did not vary between running and non-running mice (Table 1).

#### **4. Discussion**

Reproduction is physiologically and energetically demanding, particularly for females. Any activities that alter a female's capacity to allocate energy to future reproduction have the potential to alter her overall reproductive performance (Festa-Bianchet et al., 1998; Cook et al., 2004; Vézina et al., 2012; Dušek et al., 2017; Saino et al., 2017). In the present study, we show that running prior to reproduction increased a female's litter size and the mass of the weaned pups. Also, running resulted in various benefits to the bioenergetic capacity of the liver and skeletal muscle and these findings are discussed in the sections that follow.

Our first experiment confirmed that our running protocol improved the bioenergetic capacity of female mice. Specifically, we found that skeletal muscle of mice that ran displayed improved mitochondrial RCR. Also, the liver, skeletal muscle and heart of the animals that ran had higher mitochondrial density. These observations are consistent with prior studies that reported that running has broad effects on mitochondrial respiratory function in the liver (Ardies et al., 1987; Gonçalves et al., 2014), skeletal muscle (Holloszy, 1967; Zoll et al., 2002; Votion et al., 2012), and heart (Kavazis et al., 2009a; Padrao et al., 2012).

In the second experiment, females were exposed to the same conditions prior to breeding, running or not for 1-month, and the females that run gave birth to a larger litter and allocated more resources to their young during lactation, as indicated by a heavier litter at weaning. The results of experiment 1 provide likely mechanisms for this difference in reproductive performance. For example, to support nutrient transfer to the young via the placenta and mammary glands, the liver increases glucose and lipid synthesis during reproduction (Zhang et al., 2017). Females that ran had increased and more efficient liver mitochondria, which has beneficial effects on energy and glucose metabolism (Rui, 2014). Beneficial effects of exercise on reproductive performance have also been shown in knockout and diseased mice, and mice artificially selected for high running (Girard et al., 2002; Irani et al., 2005; Vega et al., 2013), and it is probable that any condition that significantly increases or decreases activity before reproduction, such as time spent foraging, evading predators, or moving between wintering and breeding grounds, could alter the performance of free-ranging and captive females (Meijer and Robbers, 2014). Running was not only associated with female having a higher capacity to allocate resources to reproduction but running prior to reproduction had benefits that persisted after the reproductive bout had ended. In skeletal muscle, an increase in enzymatic activity of

complex III and complex IV provide support for the observed increase in mitochondrial respiratory performance (Larsen et al., 2012; Crane et al., 2013). These effects could benefit a female's future fitness, contributing to improved capacity in response to future stressors such as predator evasion or future reproduction (Kearney et al., 2012).

Another variable that could have played a role in the observed carry-over effects is emission of ROS (Sies, 1997). The negative effects of damage from ROS have been proposed to include future ability to compete, attract mates, allocate resources to reproduction, and support processes that combat senescence (Sohal and Weindruch, 1996; von Schantz et al., 1999; Costantini, 2008; Monaghan et al., 2009; Metcalfe and Monaghan, 2013). Yet empirical evidence does not consistently show that an increased in ROS production is harmful (Speakman and Selman, 2011; Costantini, 2014; Speakman and Garratt, 2014; Blount et al., 2015; Costantini, 2016; Mowry et al., 2016). In the present study we show no differences in ROS emission or oxidative damage in the tissues studied other than higher 4-HNE levels in liver of the females that run and reproduced. Interestingly, these mice had higher mitochondrial density and enhanced reproductive output which suggests that oxidative damage (as measured by one marker; 4-HNE) was insufficient to have had an immediate negative impact on mitochondrial function. We also did not observe any changes in antioxidant protein levels between groups. As Selman et al. (2002) noted, antioxidant protection and repair mechanisms are likely sufficient to enable an individual to cope with any changes in ROS production. These are important findings since it has been reported that the levels of oxidative damage or antioxidant protein levels alone are poor indicators of life-history tradeoffs (Speakman et al., 2015). Also, 4-HNE has been shown to play a role as a signaling molecule (Leonarduzzi et al., 2004) and the increased levels

of PGC-1 $\alpha$  observed in this study in the livers of females that run before reproduction might be resulted from the signaling function of 4-HNE (Yoboue et al., 2014).

## 5. Conclusions

In this study, we found that a high activity before reproduction benefited females' reproductive performance and the condition of her mitochondria following the reproductive event. These results indicate that there is more nuance to how prior conditions impact the reproductive performance of females than just body fat. Prior conditions can also impact the density of mitochondria in tissue and their respiratory efficiency that can determine how much females allocate to a reproductive event. In recent years, more studies have begun to focus on how carry-over effects may impact animals' life history traits. Both energetic and non-energetic mechanisms can underpin variation in life history traits - this study demonstrated the vital role of mitochondria in determining the interaction between two energy-demanding endeavors.

**Author's Contributions.** Y.Z., A.N.K., and W.R.H conceived the study and designed the experiments; Y.Z., A.B., N.P., and H.T. collected the data; A.B. and Y.Z. analyzed the data; Y.Z., A.B., A.N.K. and W.R.H. wrote the manuscript; Y.Z., A.N.K., and W.R.H. interpreted data and revised the manuscript. All authors assume responsibility for the content of the paper.

**Data Availability.** We plan to make data accessible in the Dryad Digital Repository.

**Competing Interests.** The authors have no competing interests.

**Funding.** This research was funded by National Science Foundation grant 1453784 and US National Institutes of Health grant R03 HD083654-01 to WRH and ANK. This research was also funded by an Auburn University Cell and Molecular Biosciences Undergraduate Research Scholarship and an Undergraduate Research Grant-In-Aid from the Auburn University Department of Biological Sciences to AB.

**Acknowledgements.** We thank the Hood lab undergraduate research assistants for help monitoring the mice. Christine Kallenberg, Hayden Hyatt, and Michael Roberts for technical support in the laboratory.



## References

- Ardies, C. M., Morris, G. S., Erickson, C. K. and Farrar, R. P.** (1987). Effects of exercise and ethanol on liver mitochondrial function. *Life Sci.* **40**, 1053-1061.
- Blount, J. D., Vitikainen, E. I. K., Stott, I. and Cant, M. A.** (2015). Oxidative shielding and the cost of reproduction. *Biol. Rev.* **91**, 483-497.
- Bruunsgaard, H., Galbo, H., Halkjaer-Kristensen, J., Johansen, T. L., MacLean, D. A. and Pedersen, B. K.** (1997). Exercise-induced increase in serum interleukin-6 in humans is related to muscle damage. *The Journal of Physiology* **499**, 833-841.
- Cook, J. G., Johnson, B. K., Cook, R. C., Riggs, R. A., Delcurto, T., Bryant, L. D. and Irwin, L. L.** (2004). Effects of summer - autumn nutrition and parturition date on reproduction and survival of elk. *Wildlife Monographs* **155**, 1-61.
- Costantini, D.** (2008). Oxidative stress in ecology and evolution: lessons from avian studies. *Ecol. Lett.* **11**, 1238-1251.
- Costantini, D.** (2014). Oxidative stress and hormesis in evolutionary ecology and physiology. *Berlin and Heidelberg*, 1-38.
- Costantini, D.** (2016). Commentary: oxidative stress as a cost of reproduction: beyond the simplistic trade-off model. *Frontiers in Ecology and Evolution* **4**, 10.
- Crane, J. D., Abadi, A., Hettinga, B. P., Ogborn, D. I., MacNeil, L. G., Steinberg, G. R. and Tarnopolsky, M. A.** (2013). Elevated Mitochondrial Oxidative Stress Impairs Metabolic Adaptations to Exercise in Skeletal Muscle. *PLoS One* **8**, e81879.
- Dušek, A., Bartoš, L. and Sedláček, F.** (2017). Pre-breeding food restriction promotes the optimization of parental investment in house mice, *Mus musculus*. *PLoS One* **12**, e0173985.
- Eston, R. G., Finney, S., Baker, S. and Baltzopoulos, V.** (1996). Muscle tenderness and peak torque changes after downhill running following a prior bout of isokinetic eccentric exercise. *J. Sports Sci.* **14**, 291-299.
- Festa-Bianchet, M., Gaillard, J.-M. and Jorgenson, J. T.** (1998). Mass-and density-dependent reproductive success and reproductive costs in a capital breeder. *Am. Nat.* **152**, 367-379.
- Girard, I., Swallow, J. G., Carter, P. A., Koteja, P., Rhodes, J. S. and Garland, T.** (2002). Maternal-care behavior and life-history traits in house mice (*Mus domesticus*) artificially selected for high voluntary wheel-running activity. *Behav. Processes* **57**, 37-50.
- Gonçalves, I. O., Maciel, E., Passos, E., Torrella, J. R., Rizo, D., Viscor, G., Rocha-Rodrigues, S., Santos-Alves, E., Domingues, M. R. and Oliveira, P. J.** (2014). Exercise alters liver mitochondria phospholipidomic profile and mitochondrial activity in non-alcoholic steatohepatitis. *The international journal of biochemistry & cell biology* **54**, 163-173.
- Graham, A. L., Shuker, D. M., Pollitt, L. C., Auld, S. K., Wilson, A. J. and Little, T. J.** (2011). Fitness consequences of immune responses: strengthening the empirical framework for ecoimmunology. *Funct. Ecol.* **25**, 5-17.
- Guers, J. J., Kasecky-Lardner, L., Farquhar, W. B., Edwards, D. G. and Lennon-Edwards, S.** (2016). Voluntary Exercise Attenuates Reactive Oxygen Species Mediated Endothelial Dysfunction in Rodents Fed a High Sodium Diet Independent of Blood Pressure. *The FASEB Journal* **30**, 1287.1210-1287.1210.

- Harrison, X. A., Blount, J. D., Inger, R., Norris, D. R. and Bearhop, S.** (2011). Carry - over effects as drivers of fitness differences in animals. *J. Anim. Ecol.* **80**, 4-18.
- Holloszy, J. O.** (1967). Biochemical adaptations in muscle effects of exercise on mitochondrial oxygen uptake and respiratory enzyme activity in skeletal muscle. *J. Biol. Chem.* **242**, 2278-2282.
- Hyatt, H. W., Zhang, Y., Hood, W. R. and Kavazis, A. N.** (2017). Lactation has persistent effects on a mother's metabolism and mitochondrial function. *Sci. Rep.* **7**, 17118.
- Hyatt, H. W., Kephart, W. C., Holland, A. M., Mumford, P., Mobley, C. B., Lowery, R. P., Roberts, M. D., Wilson, J. M. and Kavazis, A. N.** (2016). A Ketogenic Diet in Rodents Elicits Improved Mitochondrial Adaptations in Response to Resistance Exercise Training Compared to an Isocaloric Western Diet. *Front. Physiol.* **7**, 533.
- Inger, R., Harrison, X. A., Ruxton, G. D., Newton, J., Colhoun, K., Gudmundsson, G. A., McElwaine, G., Pickford, M., Hodgson, D. and Bearhop, S.** (2010). Carry - over effects reveal reproductive costs in a long - distance migrant. *J. Anim. Ecol.* **79**, 974-982.
- Irani, B. G., Xiang, Z., Moore, M. C., Mandel, R. J. and Haskell-Luevano, C.** (2005). Voluntary exercise delays monogenetic obesity and overcomes reproductive dysfunction of the melanocortin-4 receptor knockout mouse. *Biochem. Biophys. Res. Commun.* **326**, 638-644.
- Kavazis, A. N., Alvarez, S., Talbert, E., Lee, Y. and Powers, S. K.** (2009a). Exercise training induces a cardioprotective phenotype and alterations in cardiac subsarcolemmal and intermyofibrillar mitochondrial proteins. *Am. J. Physiol. Heart Circ. Physiol.* **297**, H144-152.
- Kavazis, A. N., Talbert, E. E., Smuder, A. J., Hudson, M. B., Nelson, W. B. and Powers, S. K.** (2009b). Mechanical ventilation induces diaphragmatic mitochondrial dysfunction and increased oxidant production. *Free Radic. Biol. Med.* **46**, 842-850.
- Kearney, M. L., Morris, E. M., Meers, G. M., Fletcher, J. A. and Thyfault, J. P.** (2012). Voluntary wheel-running improves metabolic flexibility in the liver. *The FASEB Journal* **26**, lb719-lb719.
- Larsen, S., Nielsen, J., Hansen, C. N., Nielsen, L. B., Wibrand, F., Stride, N., Schroder, H. D., Boushel, R., Helge, J. W. and Dela, F.** (2012). Biomarkers of mitochondrial content in skeletal muscle of healthy young human subjects. *The Journal of physiology* **590**, 3349-3360.
- Legagneux, P., Fast, P. L., Gauthier, G. and Bêty, J.** (2012). Manipulating individual state during migration provides evidence for carry-over effects modulated by environmental conditions. *Proceedings of the Royal Society of London B: Biological Sciences* **279**, 876-883.
- Leonarduzzi, G., Robbesyn, F. and Poli, G.** (2004). Signaling kinases modulated by 4-hydroxynonenal. *Free Radic. Biol. Med.* **37**, 1694-1702.
- Maestripieri, D. and Mateo, J. M.** (2009). Maternal effects in mammals: University of Chicago Press.
- Meers, G., Morris, E. M., Koch, L., Britton, S. and Thyfault, J.** (2014). Voluntary wheel running is necessary for hepatic PGC-1 $\alpha$  adenovirus overexpression to increase hepatic mitochondria in LCR rats (LB741). *The FASEB Journal* **28**, LB741.
- Meijer, J. H. and Robbers, Y.** (2014). Wheel running in the wild. *Proc. Biol. Sci.* **281**.
- Metcalfe, N. B. and Monaghan, P.** (2013). Does reproduction cause oxidative stress? An open question. *Trends Ecol. Evol.* **28**.

- Monaghan, P.** (2008). Early growth conditions, phenotypic development and environmental change. *Philosophical Transactions of the Royal Society of London B: Biological Sciences* **363**, 1635-1645.
- Monaghan, P., Metcalfe, N. B. and Torres, R.** (2009). Oxidative stress as a mediator of life history trade-offs: mechanisms, measurements and interpretation. *Ecol. Lett.* **12**, 75-92.
- Mowry, A. V., Donoviel, Z. S., Kavazis, A. N. and Hood, W. R.** (2017). Mitochondrial function and bioenergetic trade - offs during lactation in the house mouse (*Mus musculus*). *Ecol. Evol.* **7**, 2994-3005.
- Mowry, A. V., Kavazis, A. N., Sirman, A. E., Potts, W. K. and Hood, W. R.** (2016). Reproduction Does Not Adversely Affect Liver Mitochondrial Respiratory Function but Results in Lipid Peroxidation and Increased Antioxidants in House Mice. *PLoS One* **11**, e0160883.
- Naguib, M., Nemitz, A. and Gil, D.** (2006). Maternal developmental stress reduces reproductive success of female offspring in zebra finches. *Proceedings of the Royal Society of London B: Biological Sciences* **273**, 1901-1905.
- O'Connor, C. M., Norris, D. R., Crossin, G. T. and Cooke, S. J.** (2014). Biological carryover effects: linking common concepts and mechanisms in ecology and evolution. *Ecosphere* **5**, 1-11.
- Padrao, A. I., Ferreira, R., Vitorino, R., Alves, R. M., Figueiredo, P., Duarte, J. A. and Amado, F.** (2012). Effect of lifestyle on age-related mitochondrial protein oxidation in mice cardiac muscle. *Eur. J. Appl. Physiol.* **112**, 1467-1474.
- Perryman, W. L., Donahue, M. A., Perkins, P. C. and Reilly, S. B.** (2002). Gray whale calf production 1994–2000: are observed fluctuations related to changes in seasonal ice cover? *Mar. Mamm. Sci.* **18**, 121-144.
- Rolfe, D. and Brown, G. C.** (1997). Cellular energy utilization and molecular origin of standard metabolic rate in mammals. *Physiol. Rev.* **77**, 731-758.
- Rui, L.** (2014). Energy metabolism in the liver. *Compr Physiol* **4**, 177-197.
- Saino, N., Romano, M., Ambrosini, R., Rubolini, D., Boncoraglio, G., Caprioli, M. and Romano, A.** (2012). Longevity and lifetime reproductive success of barn swallow offspring are predicted by their hatching date and phenotypic quality. *J. Anim. Ecol.* **81**, 1004-1012.
- Saino, N., Ambrosini, R., Caprioli, M., Romano, A., Romano, M., Rubolini, D., Scandolara, C. and Liechti, F.** (2017). Sex - dependent carry - over effects on timing of reproduction and fecundity of a migratory bird. *J. Anim. Ecol.* **86**, 239-249.
- Selman, C., McLaren, J. S., Collins, A. R., Duthie, G. G. and Speakman, J. R.** (2002). Antioxidant enzyme activities, lipid peroxidation, and DNA oxidative damage: the effects of short-term voluntary wheel running. *Arch. Biochem. Biophys.* **401**, 255-261.
- Sies, H.** (1997). Oxidative stress: oxidants and antioxidants. *Exp. Physiol.* **82**, 291-295.
- Skrip, M. M., Seeram, N. P., Yuan, T., Ma, H. and McWilliams, S. R.** (2016). Dietary antioxidants and flight exercise in female birds affect allocation of nutrients to eggs: how carry-over effects work. *J. Exp. Biol.* **219**, 2716-2725.
- Sohal, R. S. and Weindruch, R.** (1996). Oxidative stress, caloric restriction, and aging. *Science (New York, NY)* **273**, 59.
- Sorensen, M. C., Hipfner, J. M., Kyser, T. K. and Norris, D. R.** (2009). Carry-over effects in a Pacific seabird: stable isotope evidence that pre-breeding diet quality influences reproductive success. *J. Anim. Ecol.* **78**, 460-467.

- Speakman, J. R. and Selman, C.** (2011). The free - radical damage theory: Accumulating evidence against a simple link of oxidative stress to ageing and lifespan. *Bioessays* **33**, 255-259.
- Speakman, J. R. and Garratt, M.** (2014). Oxidative stress as a cost of reproduction: beyond the simplistic trade-off model. *Bioessays* **36**, 93-106.
- Speakman, J. R., Blount, J. D., Bronikowski, A. M., Buffenstein, R., Isaksson, C., Kirkwood, T. B. L., Monaghan, P., Ozanne, S. E., Beaulieu, M., Briga, M. et al.** (2015). Oxidative stress and life histories: unresolved issues and current needs. *Ecol. Evol.* **5**, 5745-5757.
- Spinazzi, M., Casarin, A., Pertegato, V., Salviati, L. and Angelini, C.** (2012a). Assessment of mitochondrial respiratory chain enzymatic activities on tissues and cultured cells. *Nat. Protoc.* **7**, 1235-1246.
- Spinazzi, M., Casarin, A., Pertegato, V., Salviati, L. and Angelini, C.** (2012b). Assessment of mitochondrial respiratory chain enzymatic activities on tissues and cultured cells. *Nat. Protocols* **7**, 1235-1246.
- Vega, C. C., Reyes-Castro, L. A., Bautista, C. J., Larrea, F., Nathanielsz, P. W. and Zambrano, E.** (2013). Exercise in obese female rats has beneficial effects on maternal and male and female offspring metabolism. *Int. J. Obes.*
- Vézina, F., Williams, T. D., Piersma, T. and Guy Morrison, R.** (2012). Phenotypic compromises in a long - distance migrant during the transition from migration to reproduction in the High Arctic. *Funct. Ecol.* **26**, 500-512.
- von Schantz, T., Bensch, S., Grahn, M., Hasselquist, D. and Wittzell, H.** (1999). Good genes, oxidative stress and condition-dependent sexual signals. *Proceedings of the Royal Society of London B: Biological Sciences* **266**, 1-12.
- Votion, D.-M., Gnaiger, E., Lemieux, H., Mouithys-Mickalad, A. and Serteyn, D.** (2012). Physical fitness and mitochondrial respiratory capacity in horse skeletal muscle. *PLoS One* **7**, e34890.
- Warren, M. and Perlroth, N.** (2001). The effects of intense exercise on the female reproductive system. *J. Endocrinol.* **170**, 3-11.
- Yoboue, E. D., Mougeolle, A., Kaiser, L., Averet, N., Rigoulet, M. and Devin, A.** (2014). The role of mitochondrial biogenesis and ROS in the control of energy supply in proliferating cells. *Biochim. Biophys. Acta* **1837**, 1093-1098.
- Zera, A. J. and Harshman, L. G.** (2001). The physiology of life history trade-offs in animals. *Annu. Rev. Ecol. Evol. Syst.* **32**.
- Zhang, Y. and Hood, W. R.** (2016). Current versus future reproduction and longevity: a re-evaluation of predictions and mechanisms. *J. Exp. Biol.* **219**, 3177-3189.
- Zhang, Y., Kallenberg, C., Hyatt, H. W., Kavazis, A. N. and Hood, W. R.** (2017). Change in the Lipid Transport Capacity of the Liver and Blood during Reproduction in Rats. *Front. Physiol.* **8**, 517.
- Zoll, J., Sanchez, H., N'Guessan, B., Ribera, F., Lampert, E., Bigard, X., Serrurier, B., Fortin, D., Geny, B., Veksler, V. et al.** (2002). Physical activity changes the regulation of mitochondrial respiration in human skeletal muscle. *The Journal of Physiology* **543**, 191-200.

**Table 1.** Markers of oxidative damage (4-HNE and protein carbonyls) and antioxidants (CuZnSOD, MnSOD, catalase, GPX-1) in liver, skeletal muscle, heart, and brain. Data were obtained by western blotting and are presented as mean  $\pm$  standard error. The units for all variables are fold change relative to the no wheel + repro group. n = 9 for each group or labeled in the column.

|                         | <b>4-HNE</b>                                      | <b>Prot. carb</b> | <b>Catalase</b> | <b>GPX-1</b>    | <b>CuZnSOD</b>  | <b>MnSOD</b>    |
|-------------------------|---------------------------------------------------|-------------------|-----------------|-----------------|-----------------|-----------------|
| <b>Liver:</b>           |                                                   |                   |                 |                 |                 |                 |
| no wheel + repro        | <b>1.00 <math>\pm</math> 0.10<sup>a</sup> (8)</b> | 1.00 $\pm$ 0.09   | 1.00 $\pm$ 0.20 | 1.00 $\pm$ 0.13 | 1.00 $\pm$ 0.17 | 1.00 $\pm$ 0.09 |
| wheel + repro           | <b>1.10 <math>\pm</math> 0.15<sup>b</sup> (9)</b> | 0.98 $\pm$ 0.09   | 1.07 $\pm$ 0.16 | 0.95 $\pm$ 0.12 | 0.74 $\pm$ 0.08 | 0.99 $\pm$ 0.08 |
| <b>Skeletal muscle:</b> |                                                   |                   |                 |                 |                 |                 |
| no wheel + repro        | 1.00 $\pm$ 0.07                                   | 1.00 $\pm$ 0.06   | 1.00 $\pm$ 0.17 | 1.00 $\pm$ 0.13 | 1.00 $\pm$ 0.20 | 1.00 $\pm$ 0.20 |
| wheel + repro           | 0.93 $\pm$ 0.07                                   | 0.98 $\pm$ 0.07   | 0.72 $\pm$ 0.16 | 0.94 $\pm$ 0.15 | 0.97 $\pm$ 0.21 | 0.91 $\pm$ 0.20 |
| <b>Heart:</b>           |                                                   |                   |                 |                 |                 |                 |
| no wheel + repro        | 1.00 $\pm$ 0.12                                   | 1.00 $\pm$ 0.81   | 1.00 $\pm$ 0.17 | 1.00 $\pm$ 0.16 | 1.00 $\pm$ 0.21 | 1.00 $\pm$ 0.11 |
| wheel + repro           | 0.97 $\pm$ 0.15                                   | 0.99 $\pm$ 0.80   | 0.72 $\pm$ 0.16 | 1.24 $\pm$ 0.14 | 1.08 $\pm$ 0.30 | 1.09 $\pm$ 0.16 |
| <b>Brain:</b>           |                                                   |                   |                 |                 |                 |                 |
| no wheel + repro        | 1.00 $\pm$ 0.14                                   | 1.00 $\pm$ 0.12   | 1.00 $\pm$ 0.27 | 1.00 $\pm$ 0.35 | 1.00 $\pm$ 0.13 | 1.00 $\pm$ 0.29 |
| wheel + repro           | 1.01 $\pm$ 0.15                                   | 1.08 $\pm$ 0.17   | 0.89 $\pm$ 0.17 | 0.72 $\pm$ 0.25 | 0.87 $\pm$ 0.07 | 0.92 $\pm$ 0.14 |

Numbers in bold are statistically significant with letters indicating differences between groups, see result

**Figures**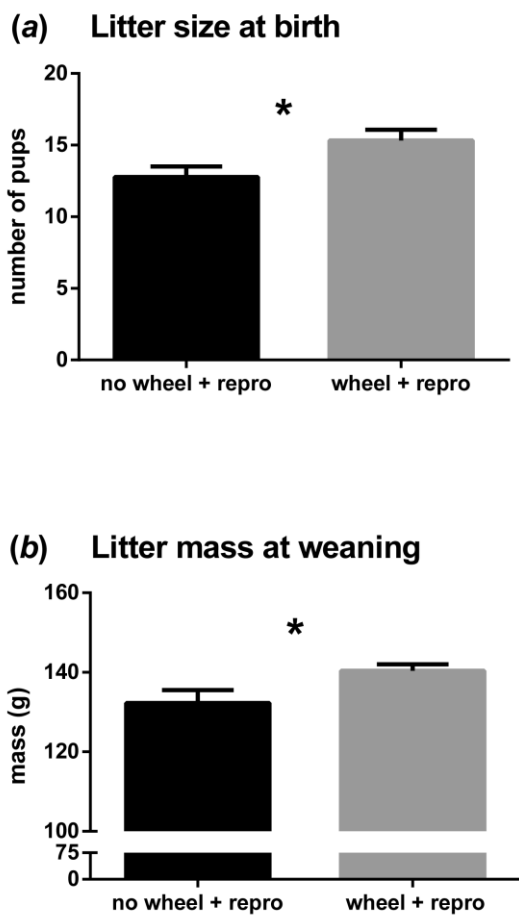

**Figure 1.** (a) Litter size at birth and (b) mass of weaned pups by each female. Data are presented as mean  $\pm$  standard error.  $n = 9$  for each group. \* indicates  $P < 0.05$

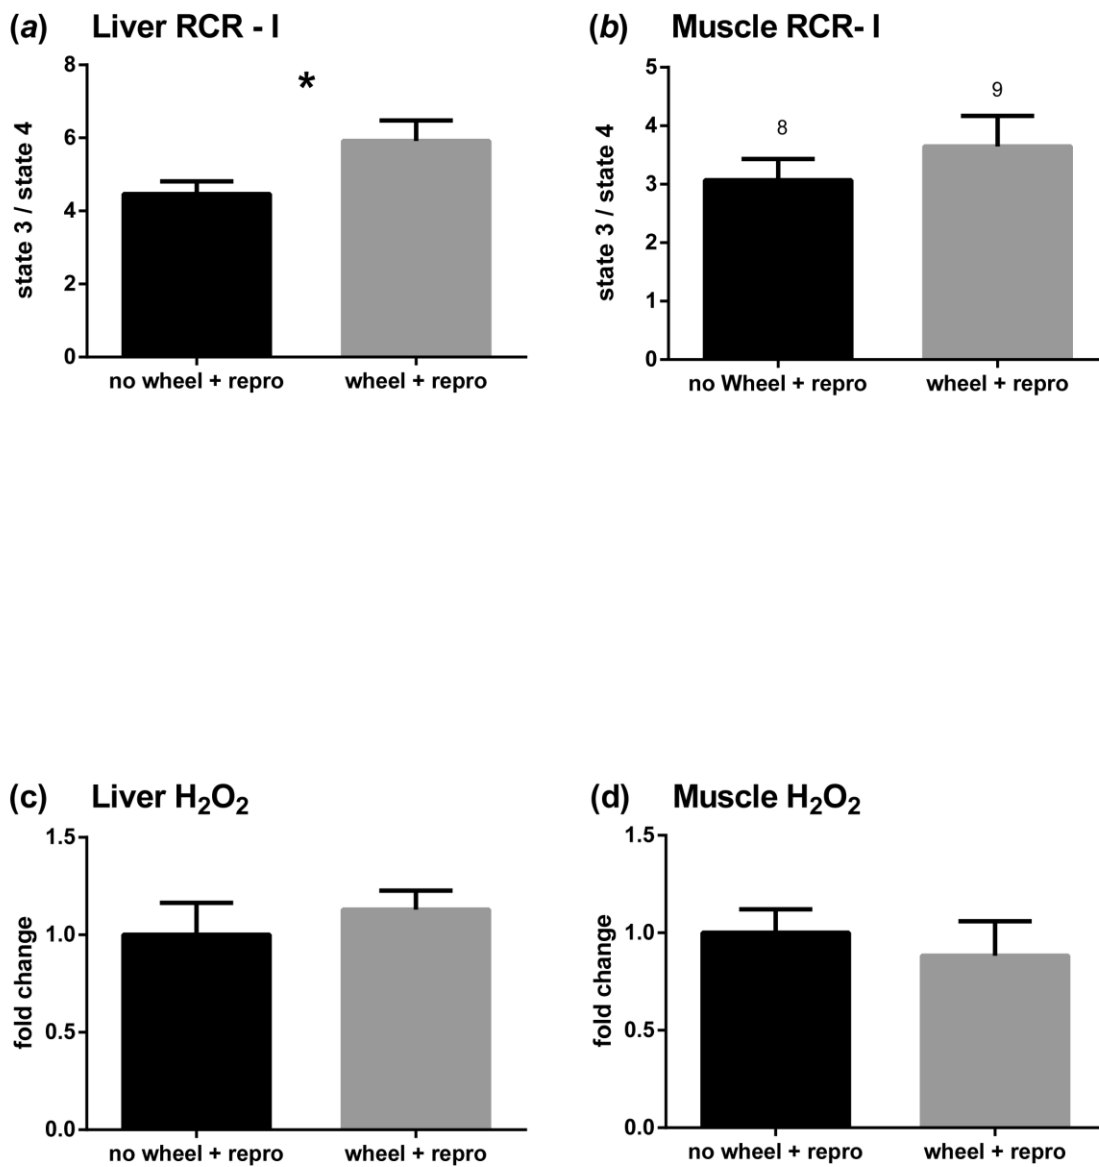

**Figure 2.** Respiratory control ratio (RCR) and hydrogen peroxide emission by isolated mitochondria. Data are presented as mean  $\pm$  standard error. n = 9 for each group unless labeled above bars. \* indicates P < 0.05

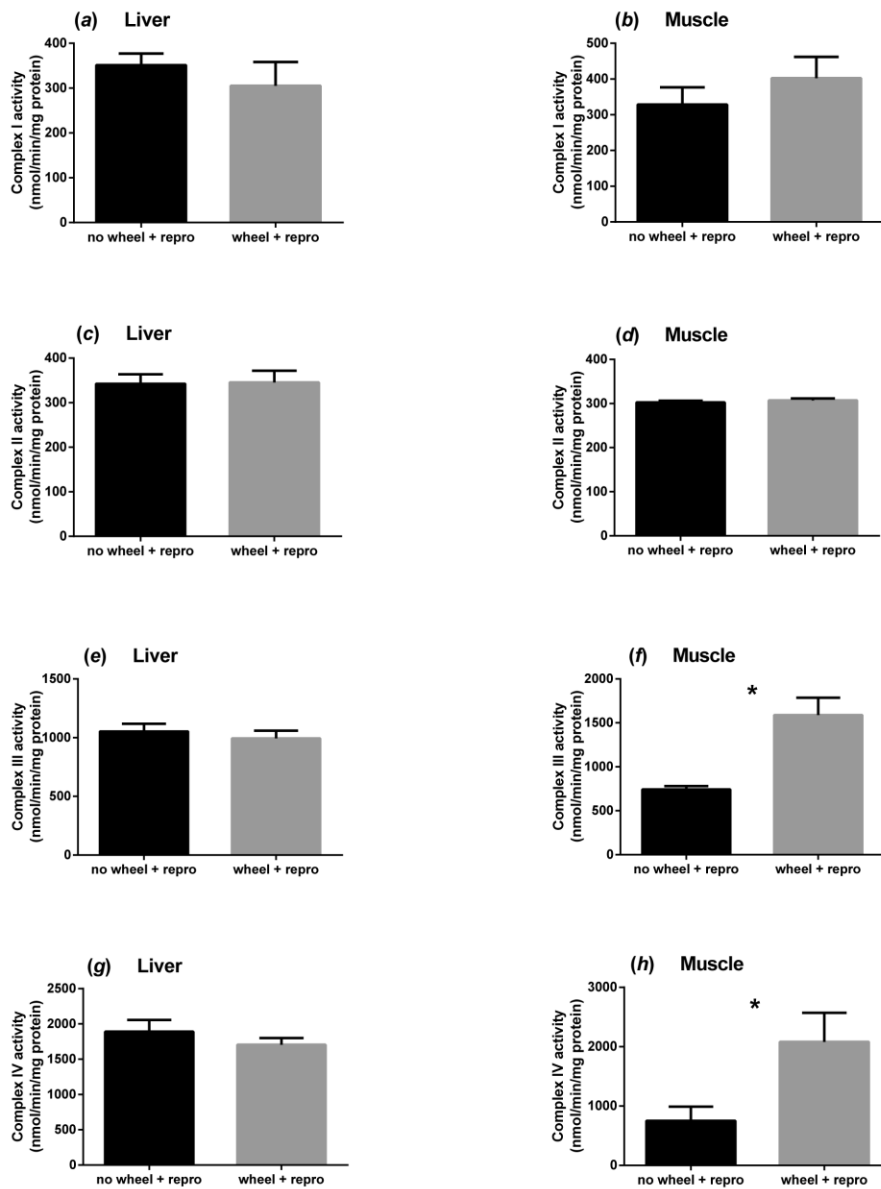

**Figure 3.** Enzymatic activity of mitochondrial complexes isolated from liver and skeletal muscles, including (a, b) complex I, (c, d) complex II, (e, f) complex III, and (g, h) complex IV.

Data are presented as mean  $\pm$  standard error.  $n = 9$  for each group. \* indicates  $P < 0.05$



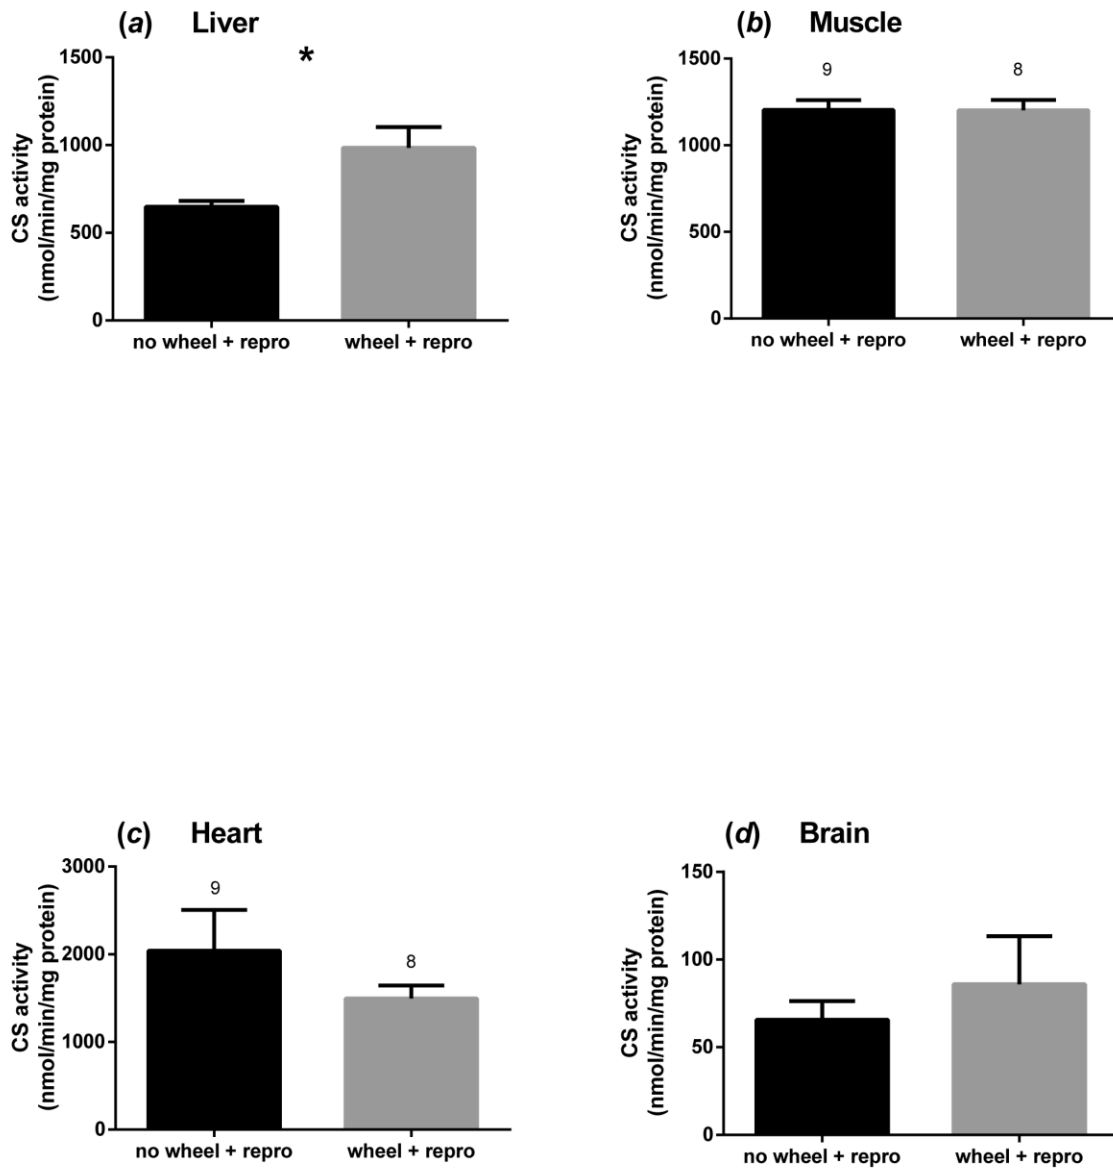

**Figure 4.** Activity of citrate synthase in the (a) liver, (b) skeletal muscle, (c) heart, and (d) brain of mice. Data are presented as mean  $\pm$  standard error. n = 9 for each group unless labeled above bars. \* indicates  $P < 0.05$

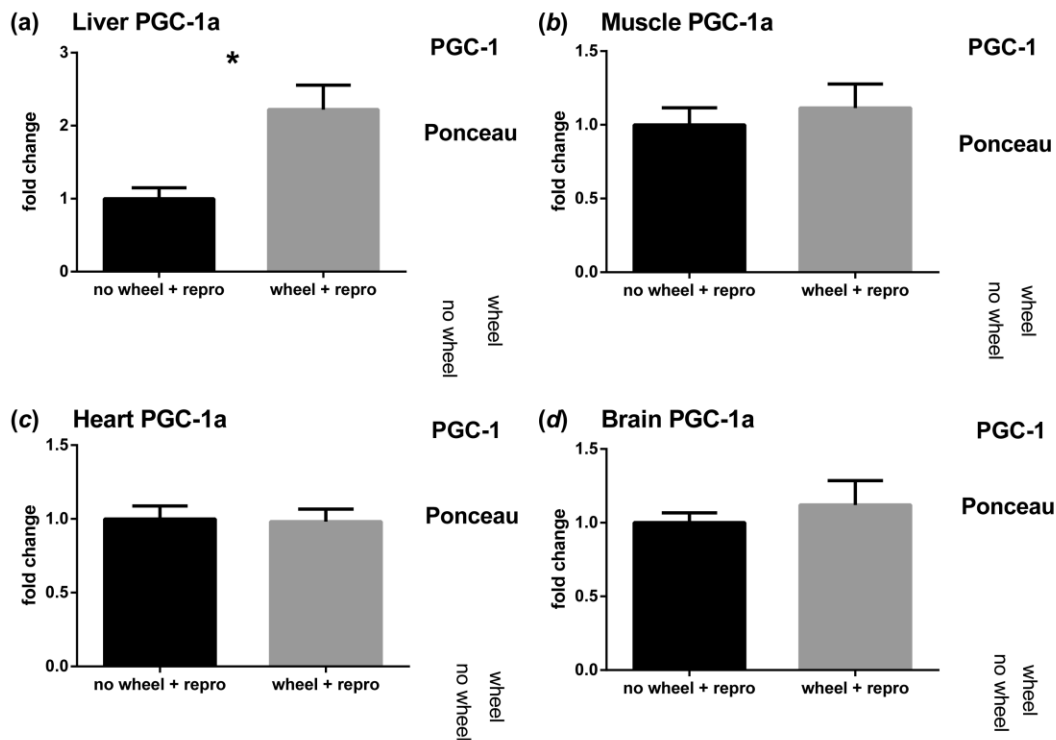

**Figure 5.** Relative peroxisome proliferator-activated receptor  $\gamma$  coactivator 1 (PGC-1 $\alpha$ ) expression in the (a) liver, (b) skeletal muscle, (c) heart, and (d) brain of mice. Data are presented as mean  $\pm$  standard error.  $n = 9$  for each group. \* indicates  $P < 0.05$

**Supplementary Table 1.** Markers of oxidative damage (4-HNE and protein carbonyls) and antioxidants (CuZnSOD, MnSOD, catalase, GPX-1) in liver, skeletal muscle, heart, and brain. Data were obtained by western blotting and are presented as mean  $\pm$  standard error. The units for all variables are fold change relative to the no wheel group. n = 10 for each group. No significant differences were detected between groups ( $P > 0.05$ ).

|                         | <b>4-HNE</b>    | <b>Prot. carb</b> | <b>Catalase</b> | <b>GPX-1</b>     | <b>CuZnSOD</b>  | <b>MnSOD</b>    |
|-------------------------|-----------------|-------------------|-----------------|------------------|-----------------|-----------------|
| <b>Liver:</b>           |                 |                   |                 |                  |                 |                 |
| no wheel                | 1.00 $\pm$ 0.05 | 1.00 $\pm$ 0.11   | 1.00 $\pm$ 0.12 | 1.00 $\pm$ 0.10  | 1.00 $\pm$ 0.19 | 1.00 $\pm$ 0.06 |
| wheel                   | 1.03 $\pm$ 0.08 | 0.91 $\pm$ 0.08   | 1.21 $\pm$ 0.18 | 0.94 $\pm$ 0.10  | 0.79 $\pm$ 0.17 | 0.99 $\pm$ 0.11 |
| <b>Skeletal muscle:</b> |                 |                   |                 |                  |                 |                 |
| no wheel                | 1.00 $\pm$ 0.08 | 1.00 $\pm$ 0.07   | 1.00 $\pm$ 0.20 | 1.00 $\pm$ 0.19  | 1.00 $\pm$ 0.18 | 1.00 $\pm$ 0.18 |
| wheel                   | 1.03 $\pm$ 0.07 | 1.03 $\pm$ 0.06   | 1.03 $\pm$ 0.16 | 1.10 $\pm$ 0.21  | 1.12 $\pm$ 0.20 | 1.12 $\pm$ 0.20 |
| <b>Heart:</b>           |                 |                   |                 |                  |                 |                 |
| no wheel                | 1.00 $\pm$ 0.17 | 1.00 $\pm$ 0.24   | 1.00 $\pm$ 0.17 | 1.00 $\pm$ 0.57  | 1.00 $\pm$ 0.23 | 1.00 $\pm$ 0.13 |
| wheel                   | 0.96 $\pm$ 0.19 | 1.04 $\pm$ 0.08   | 0.74 $\pm$ 0.11 | 0.894 $\pm$ 0.11 | 1.06 $\pm$ 0.22 | 1.03 $\pm$ 0.12 |
| <b>Brain:</b>           |                 |                   |                 |                  |                 |                 |
| no wheel                | 1.00 $\pm$ 0.13 | 1.00 $\pm$ 0.10   | 1.00 $\pm$ 0.19 | 1.00 $\pm$ 0.27  | 1.00 $\pm$ 0.12 | 1.00 $\pm$ 0.20 |
| wheel                   | 1.00 $\pm$ 0.12 | 1.11 $\pm$ 0.13   | 0.95 $\pm$ 0.16 | 1.03 $\pm$ 0.27  | 1.19 $\pm$ 0.14 | 0.79 $\pm$ 0.21 |

Figure 1

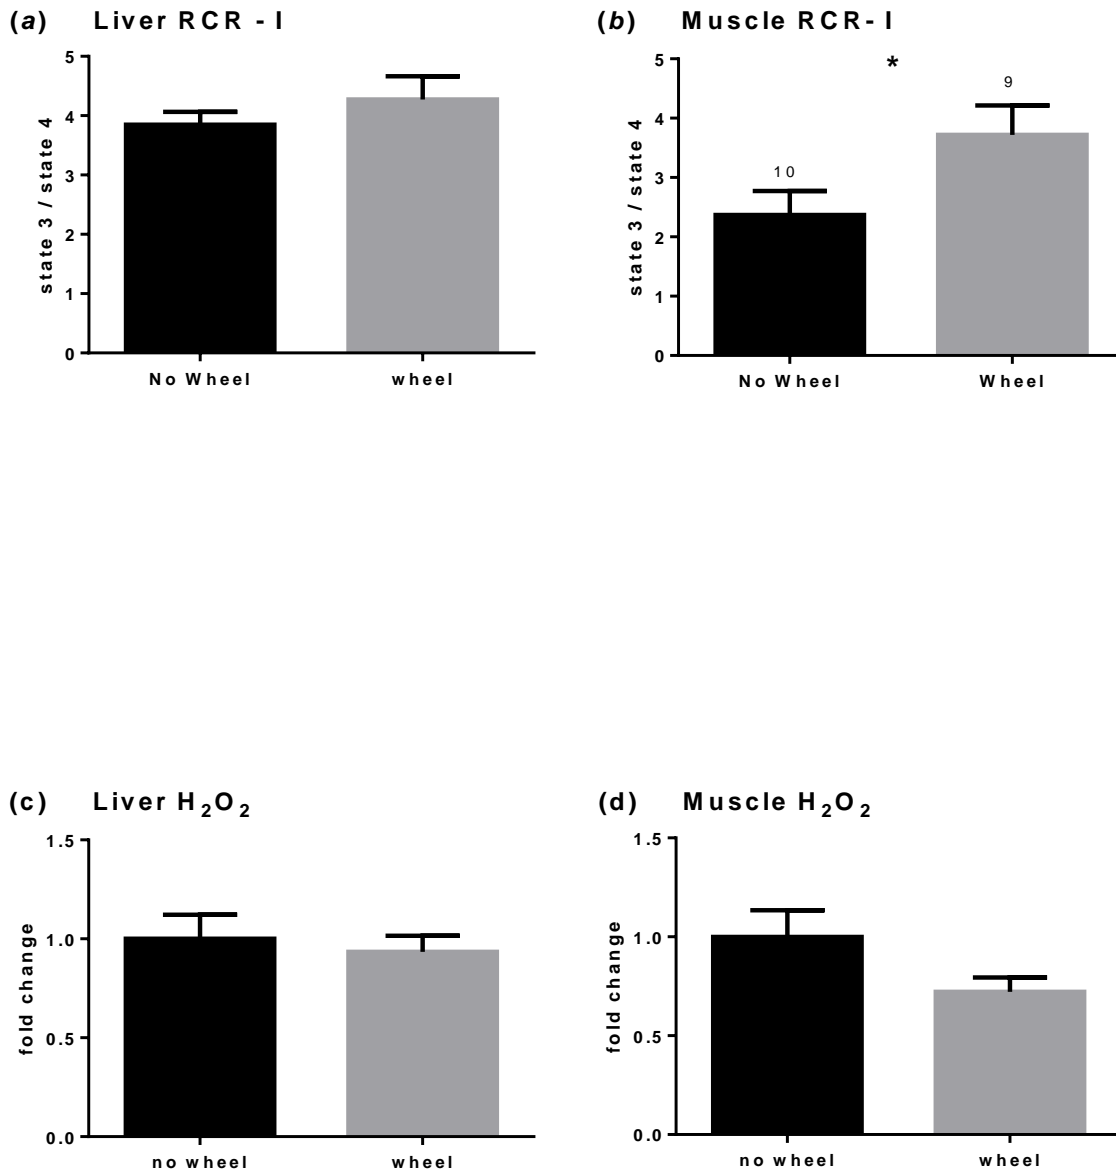

**Supplementary Figure 1.** Respiratory control ratio (RCR) and hydrogen peroxide (H<sub>2</sub>O<sub>2</sub>) emission by isolated mitochondria. Data from mitochondria isolated from (a and c) liver and (b and d) skeletal muscle. Data are presented as mean  $\pm$  standard error. n = 10 for each group unless labeled above bars. \* indicates P < 0.05

Figure 2

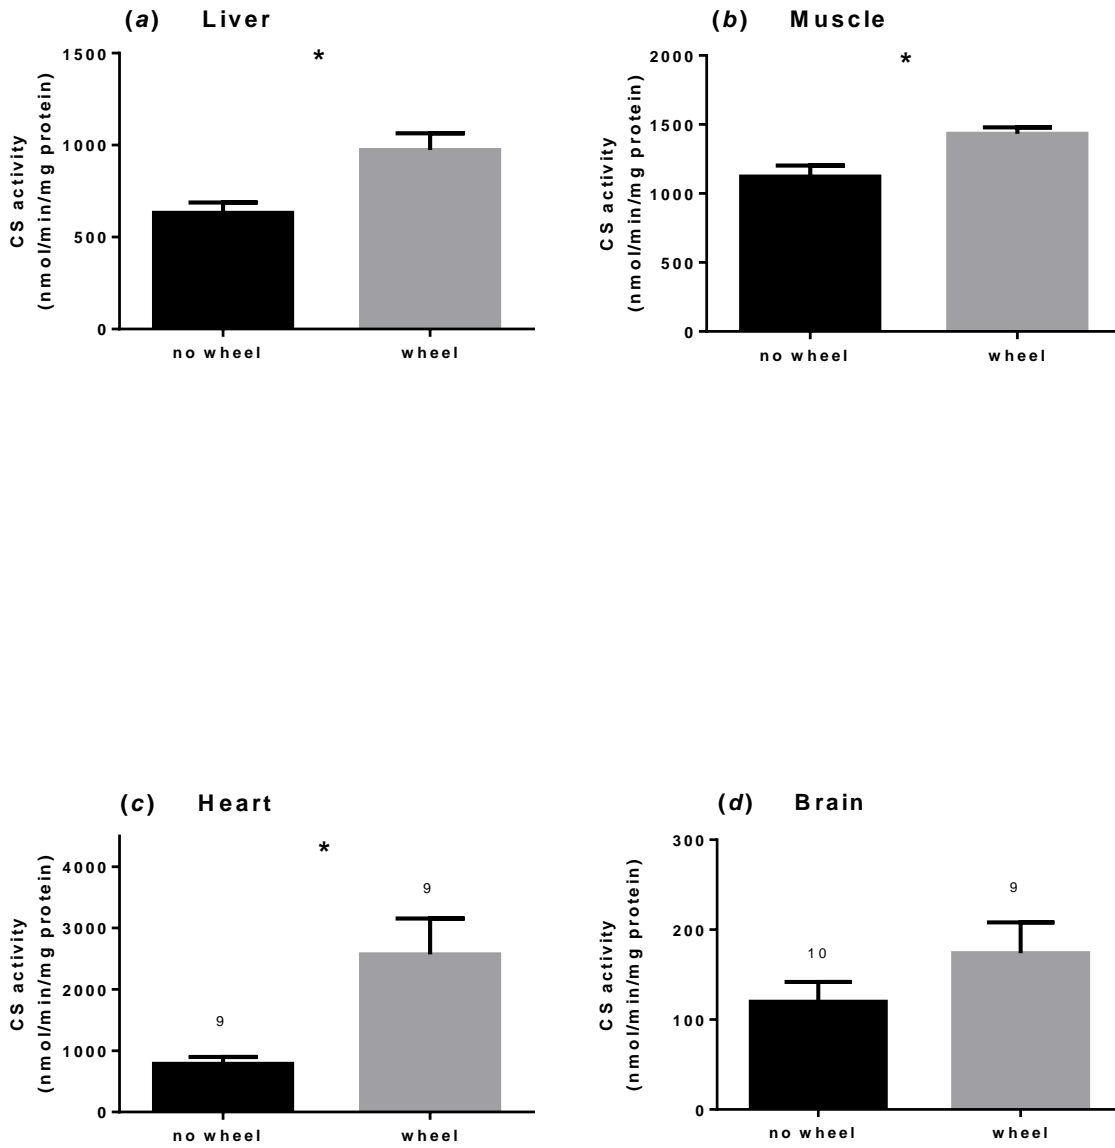

**Supplementary Figure 2.** Activity of citrate synthase in the (a) liver, (b) skeletal muscle, (c) heart, and (d) brain of mice. Data are presented as mean  $\pm$  standard error. n = 10 unless labeled above bars. \* indicates  $P < 0.05$
